# Supplementary material for: Comparison of Common Enrichment Broths Used in Diagnostic Laboratories for Shiga Toxin—Producing Escherichia coli
Source: PubMed Central journal article supplement (PMC7997271; doi:10.3390/microorganisms9030503), 2021-02-27
Supplement: microorganisms-09-00503-s001.pdf [file microorganisms-09-00503-s001.pdf]

Supplementary Table S1. Bacterial Isolate Characteristics

| Bacterial Isolate | Serotype | <i>stx</i> status |
|-------------------|----------|-------------------|
| 1                 | O45      | 1                 |
| 2                 | O45      | 1                 |
| 3*                | O45      | 1                 |
| 4*                | O26      | 1                 |
| 5*                | O26      | 2                 |
| 6                 | O26      | 1                 |
| 7*                | O26      | 1                 |
| 8                 | O26      | 1                 |
| 9                 | O26      | 2                 |
| 10                | O103     | 1                 |
| 11                | O103     | 1                 |
| 12                | O103     | 1                 |
| 13*               | O103     | 1                 |
| 14                | O103     | 1                 |
| 15*               | O103     | 1                 |
| 16                | O111     | 1 and 2           |
| 17*               | O111     | 1 and 2           |
| 18                | O111     | 1                 |
| 19                | O111     | 1 and 2           |
| 20*               | O111     | 1                 |
| 21                | O121     | 2                 |
| 22*               | O121     | 2                 |
| 23                | O121     | 2                 |
| 24                | O121     | 2                 |
| 25*               | O121     | 2                 |
| 26                | O121     | 2                 |
| 27                | O145     | 2                 |
| 28                | O145     | 2                 |
| 29*               | O145     | 2                 |
| 30*               | O145     | 1                 |
| 31                | O145     | 1                 |
| 32                | O118     | 1                 |
| 33                | O118     | 1                 |
| 34*               | O118     | 1                 |
| 35*               | O118     | 1                 |
| 36*               | O71      | 1                 |
| 37*               | O71      | 1                 |
| 38                | O71      | 1                 |
| 39*               | O146     | 1 and 2           |
| 40                | O113     | 2                 |

|                                                                        |         |         |
|------------------------------------------------------------------------|---------|---------|
| 41*                                                                    | O85     | 2       |
| 42*                                                                    | O38     | 1 and 2 |
| 43                                                                     | O91     | 1 and 2 |
| 44                                                                     | O91     | 2       |
| 45*                                                                    | O22     | 1       |
| 46                                                                     | O157    | 2       |
| 47                                                                     | O157    | 1 and 2 |
| 48*                                                                    | O157    | 1 and 2 |
| 49*                                                                    | O157    | 2       |
| 50*                                                                    | O157    | 2       |
| 51*                                                                    | O5      | 1       |
| 52*                                                                    | O Rough | 1       |
| * Indicates which isolates were used for the stool spiking experiments |         |         |
